# Supplementary material for: Comprehensive genome analysis of a pangolin-associated Paraburkholderia fungorum provides new insights into its secretion systems and virulence
Source: PeerJ. 2020 Sep 3;8:e9733. doi: 10.7717/peerj.9733 (PMC7474880; doi:10.7717/peerj.9733)
Supplement: Supplemental Information 4 [file peerj-08-9733-s004.xlsx]

## Sheet: Sheet1
ID	B. cenocepacia AU1054		B. cepacia GG4		B. gladioli ATCC10248		B. glumae LMG 2196		B. mallei ATCC 23344		B. multivorans ATCC 17616		B. oklahomensis EO147		B. pseudomallei K96243		B. pyrrocinia DSM 10685		B. thailandensis MSMB59		B. ubonensis MSMB22		B. vietnamiensis LMG 10929		P. fungorum ATCC BAA 463		P. fungorum Pf		P. phenoliruptrix BR3459a		P. phymatum STM815		P. phytofirmans PsJN		P. xenovorans LB400
	pident	cov	pident	cov	pident	cov	pident	cov	pident	cov	pident	cov	pident	cov	pident	cov	pident	cov	pident	cov	pident	cov	pident	cov	pident	cov	pident	cov	pident	cov	pident	cov	pident	cov	pident	cov
wcbN	0	0	0	0	0	0	0	0	99.435	100	0	0	0	0	100	100	0	0	0	0	0	0	0	0	0	0	0	0	0	0	0	0	0	0	0	0
wcbM	0	0	0	0	0	0	0	0	99.275	100	0	0	0	0	99.479	100	0	0	0	0	0	0	0	0	0	0	0	0	0	0	0	0	0	0	0	0
wcbE	0	0	0	0	0	0	0	0	100	100	0	0	0	0	99.801	100	0	0	0	0	0	0	0	0	0	0	0	0	0	0	0	0	0	0	0	0
wcbK	0	0	0	0	0	0	0	0	99.699	100	0	0	0	0	100	100	0	0	0	0	0	0	0	0	0	0	0	0	0	0	0	0	0	0	0	0
bopC	0	0	0	0	0	0	0	0	0	0	0	0	0	0	100	99	0	0	0	0	0	0	0	0	0	0	0	0	0	0	0	0	0	0	0	0
wcbJ	0	0	0	0	0	0	0	0	99.636	100	0	0	0	0	100	100	0	0	0	0	0	0	0	0	0	0	0	0	0	0	0	0	0	0	0	0
wcbI	0	0	0	0	0	0	0	0	100	100	0	0	0	0	100	100	0	0	0	0	0	0	0	0	0	0	0	0	0	0	0	0	0	0	0	0
wcbH	0	0	0	0	0	0	0	0	100	100	0	0	0	0	100	100	0	0	0	0	0	0	0	0	0	0	0	0	0	0	0	0	0	0	0	0
VFG002555:wcbL	0	0	0	0	0	0	0	0	99.668	100	0	0	0	0	99.668	100	0	0	0	0	0	0	0	0	0	0	0	0	0	0	0	0	0	0	0	0
wcbG	0	0	0	0	0	0	0	0	100	100	0	0	0	0	100	100	0	0	0	0	0	0	0	0	0	0	0	0	0	0	0	0	0	0	0	0
wcbF	0	0	0	0	69.583	93	0	0	100	100	0	0	87.17	100	99.76	100	0	0	89.811	100	0	0	0	0	0	0	0	0	0	0	0	0	0	0	0	0
pilV	0	0	0	0	0	0	0	0	100	100	0	0	85.791	99	99.821	100	0	0	100	100	83.633	99	0	0	0	0	0	0	0	0	0	0	0	0	0	0
pilO	0	0	0	0	0	0	0	0	100	100	0	0	91.841	100	100	100	0	0	100	100	89.744	100	0	0	0	0	0	0	0	0	0	0	0	0	0	0
VFG002485: tagD-5	0	0	0	0	0	0	0	0	100	100	0	0	86.923	100	100	100	0	0	90.769	100	41.176	67	0	0	0	0	0	0	0	0	0	0	0	0	0	0
pilN	0	0	0	0	0	0	0	0	100	100	0	0	88.049	94	100	100	0	0	100	100	86.86	100	0	0	0	0	0	0	0	0	0	0	0	0	0	0
bprQ	0	0	0	0	0	0	0	0	100	100	0	0	0	0	100	100	0	0	100	100	0	0	0	0	0	0	0	0	0	0	0	0	0	0	0	0
orgB	0	0	0	0	0	0	0	0	100	100	0	0	90.526	86	100	100	0	0	94.606	77	0	0	0	0	0	0	0	0	0	0	0	0	0	0	0	0
orgA	0	0	0	0	0	0	0	0	100	100	0	0	84.103	100	100	100	0	0	100	100	0	0	0	0	0	0	0	0	0	0	0	0	0	0	0	0
bsaV	0	0	0	0	0	0	0	0	100	100	0	0	86.196	100	100	100	0	0	100	100	0	0	0	0	0	0	0	0	0	0	0	0	0	0	0	0
bsaU	0	0	0	0	0	0	0	0	100	100	0	0	59.277	100	100	100	0	0	98.759	100	0	0	0	0	0	0	0	0	0	0	0	0	0	0	0	0
bsaT	0	0	0	0	0	0	0	0	100	100	0	0	85.714	100	100	100	0	0	100	100	0	0	0	0	0	0	0	0	0	0	0	0	0	0	0	0
bsaR	0	0	0	0	0	0	0	0	100	100	0	0	85.926	100	100	100	0	0	100	100	0	0	0	0	0	0	0	0	0	0	0	0	0	0	0	0
bsaP	0	0	0	0	0	0	0	0	100	100	0	0	87.863	99	100	100	0	0	99.213	100	0	0	0	0	0	0	0	0	0	0	0	0	0	0	0	0
bsaN	0	0	0	0	0	0	0	0	100	100	0	0	89.855	76	100	94	0	0	99.603	100	0	0	0	0	0	0	0	0	0	0	0	0	0	0	0	0
bsaM	0	0	0	0	0	0	0	0	100	100	0	0	78.505	100	100	100	0	0	99.36	100	0	0	0	0	0	0	0	0	0	0	0	0	0	0	0	0
bsaL	0	0	0	0	0	0	0	0	100	100	0	0	79.775	100	100	100	0	0	100	100	0	0	0	0	0	0	0	0	0	0	0	0	0	0	0	0
bsaK	0	0	0	0	0	0	0	0	100	100	0	0	93	100	100	100	0	0	100	100	0	0	0	0	0	0	0	0	0	0	0	0	0	0	0	0
bprP	0	0	0	0	0	0	0	0	100	95	0	0	46.875	54	100	100	0	0	99.677	100	0	0	0	0	0	0	0	0	0	0	0	0	0	0	0	0
bprD	0	0	0	0	0	0	0	0	100	100	0	0	45.745	87	100	100	0	0	99.315	99	0	0	0	0	0	0	0	0	0	0	0	0	0	0	0	0
bprC	0	0	0	0	0	0	0	0	100	100	0	0	80.675	93	100	100	0	0	100	100	0	0	0	0	0	0	0	0	0	0	0	0	0	0	0	0
bopE	0	0	0	0	0	0	0	0	100	100	0	0	87.692	100	100	100	0	0	100	100	0	0	0	0	0	0	0	0	0	0	0	0	0	0	0	0
bopA	0	0	0	0	0	0	0	0	100	91	0	0	80.664	85	100	100	0	0	100	100	0	0	0	0	0	0	0	0	0	0	0	0	0	0	0	0
bipD	0	0	0	0	0	0	0	0	100	100	0	0	83.032	89	100	100	0	0	94.182	89	0	0	0	0	0	0	0	0	0	0	0	0	0	0	0	0
bipC	0	0	0	0	0	0	0	0	100	100	0	0	75.735	99	100	100	0	0	99.756	100	0	0	0	0	0	0	0	0	0	0	0	0	0	0	0	0
bipB	0	0	0	0	0	0	0	0	100	100	0	0	85.28	100	100	100	0	0	100	100	0	0	0	0	0	0	0	0	0	0	0	0	0	0	0	0
bicP	0	0	0	0	0	0	0	0	100	100	0	0	77.931	86	100	100	0	0	100	100	0	0	0	0	0	0	0	0	0	0	0	0	0	0	0	0
bicA	0	0	0	0	0	0	0	0	100	100	0	0	96.178	91	100	100	0	0	100	100	0	0	0	0	0	0	0	0	0	0	0	0	0	0	0	0
bapB	0	0	0	0	0	0	0	0	100	100	0	0	83.784	80	100	100	0	0	100	100	0	0	0	0	0	0	0	0	0	0	0	0	0	0	0	0
bapA	0	0	0	0	0	0	0	0	99.777	100	0	0	65.83	73	100	100	0	0	97.955	100	0	0	0	0	0	0	0	0	0	0	0	0	0	0	0	0
VFG002489: tssM-5	0	0	0	0	0	0	0	0	97.468	100	0	0	79.412	99	100	100	0	0	82.456	52	0	0	0	0	0	0	0	0	0	0	0	0	0	0	0	0
VFG002486: tssJ-5	0	0	0	0	0	0	0	0	99.556	100	0	0	77.725	86	99.556	85	0	0	85.782	79	0	0	0	0	0	0	0	0	0	0	0	0	0	0	0	0
VFG025337:tssJ	0	0	0	0	0	0	0	0	99.556	100	0	0	77.251	86	99.623	100	0	0	80.224	100	0	0	0	0	0	0	0	0	0	0	0	0	0	0	0	0
VFG003515:sycB	0	0	0	0	0	0	0	0	51.37	85	0	0	53.425	84	51.37	85	0	0	49.359	91	0	0	0	0	0	0	0	0	0	0	0	0	0	0	0	0
VFG018552:prgJ	0	0	0	0	0	0	0	0	0	0	0	0	41.892	74	0	0	0	0	0	0	0	0	0	0	0	0	0	0	0	0	0	0	0	0	0	0
VFG025363:icmF1	0	0	0	0	0	0	0	0	100	100	0	0	79.417	100	97.468	100	0	0	85.349	97	0	0	0	0	0	0	0	0	0	0	0	0	0	0	0	0
VFG000820:cesD	0	0	0	0	0	0	0	0	0	0	0	0	42.754	87	0	0	0	0	0	0	0	0	0	0	0	0	0	0	0	0	0	0	0	0	0	0
VFG025369:BURPS668_A2138	0	0	0	0	0	0	0	0	98.213	100	0	0	79.758	99	98.795	100	0	0	85.886	97	0	0	0	0	0	0	0	0	0	0	0	0	0	0	0	0
VFG025368:BURPS1710b_A0549	0	0	0	0	0	0	0	0	98.322	98	0	0	79.266	97	98.768	98	0	0	85.273	95	0	0	0	0	0	0	0	0	0	0	0	0	0	0	0	0
VFG025367:BURPS1106A_A2040	0	0	0	0	0	0	0	0	98.734	100	0	0	79.585	99	98.726	100	0	0	85.37	97	0	0	0	0	0	0	0	0	0	0	0	0	0	0	0	0
VFG025344:BTH_II0858	0	0	0	0	0	0	0	0	86.256	94	0	0	81.633	82	76.493	100	0	0	99.627	100	0	0	0	0	0	0	0	0	0	0	0	0	0	0	0	0
VFG025371:BTH_II0855	0	0	0	0	0	0	0	0	83.959	92	0	0	76.006	99	79.37	98	0	0	99.846	100	0	0	0	0	0	0	0	0	0	0	0	0	0	0	0	0
VFG025366:BMASAVP1_0619	0	0	0	0	0	0	0	0	99.041	100	0	0	79.585	99	96.679	100	0	0	85.542	97	0	0	0	0	0	0	0	0	0	0	0	0	0	0	0	0
VFG025364:BMA10229_0730	0	0	0	0	0	0	0	0	98.362	100	0	0	79.585	99	99.092	100	0	0	82.456	52	0	0	0	0	0	0	0	0	0	0	0	0	0	0	0	0
VFG025365:BMA10247_A1688	0	0	0	0	0	0	0	0	98.138	100	0	0	79.585	99	99.318	100	0	0	82.456	52	0	0	0	0	0	0	0	0	0	0	0	0	0	0	0	0
VFG026328:BTH_I1329	0	0	0	0	0	0	0	0	0	0	0	0	90.049	100	0	0	56.604	100	100	100	0	0	0	0	0	0	0	0	0	0	0	0	0	0	0	0
VFG026329:BTH_I1328	0	0	0	0	47.471	54	0	0	0	0	0	0	84.197	100	0	0	55.032	100	99.867	100	0	0	0	0	0	0	0	0	0	0	0	0	0	0	0	0
VFG007075:epsI	0	0	0	0	0	0	0	0	0	0	0	0	0	0	0	0	0	0	0	0	0	0	0	0	40.625	48	0	0	0	0	0	0	0	0	0	0
VFG023682:flgA	42.771	41	0	0	0	0	0	0	40.964	65	43.976	43	0	0	0	0	0	0	0	0	0	0	0	0	0	0	0	0	0	0	0	0	0	0	0	0
vapA3	41.573	89	0	0	0	0	0	0	0	0	0	0	0	0	0	0	0	0	0	0	40	90	0	0	0	0	0	0	0	0	0	0	0	0	0	0
virB5	42.759	90	0	0	0	0	0	0	0	0	0	0	0	0	0	0	0	0	0	0	0	0	0	0	0	0	0	0	0	0	0	0	0	0	0	0
VFG026316:Bcen_0289	100	100	0	0	0	0	0	0	0	0	0	0	0	0	0	0	0	0	0	0	0	0	0	0	0	0	0	0	0	0	0	0	0	0	0	0
VFG026317:Bcen2424_0775	100	100	0	0	0	0	0	0	0	0	0	0	0	0	0	0	0	0	0	0	0	0	0	0	0	0	0	0	0	0	0	0	0	0	0	0
VFG015528:phzB2	0	0	0	0	0	0	62.585	89	0	0	0	0	0	0	0	0	0	0	0	0	0	0	0	0	0	0	0	0	0	0	0	0	0	0	0	0
VFG000507:ssaG	0	0	0	0	0	0	0	0	0	0	0	0	49.296	100	0	0	0	0	0	0	0	0	0	0	0	0	0	0	0	0	0	0	0	0	0	0
VFG018475:sscA	0	0	0	0	0	0	0	0	0	0	0	0	40.58	86	0	0	0	0	0	0	0	0	0	0	0	0	0	0	0	0	0	0	0	0	0	0
VFG012305:fimF	0	0	0	0	0	0	0	0	0	0	0	0	0	0	0	0	0	0	0	0	41.322	96	0	0	0	0	0	0	0	0	0	0	0	0	0	0
wcbR	99.961	100	69.129	99	71.217	97	72.006	99	99.96	100	42.958	98	89.199	100	99.96	100	92.902	100	99.961	100	0	0	0	0	0	0	0	0	0	0	0	0	0	0	41.317	50
wcbT	100	100	95.701	100	86.667	89	85.897	88	100	100	62.274	86	96.136	100	100	100	97.26	99	100	97	0	0	0	0	0	0	0	0	0	0	0	0	0	0	0	0
VFG026303:Bcen_0285	100	97	43.488	89	54.327	91	55.921	89	60.229	99	41.892	93	60.032	91	56.771	99	55.975	94	60.65	92	0	0	0	0	0	0	0	0	0	0	0	0	0	0	0	0
wcbA	99.845	97	43.488	89	57.824	76	59.091	77	100	100	41.892	93	86.451	100	100	100	67.629	97	99.85	100	0	0	0	0	0	0	0	0	0	0	0	0	0	0	0	0
VFG026322:Bcen2424_0779	99.407	100	64.09	98	67.179	99	67.436	99	68.293	99	0	0	70	96	66.416	99	69.463	99	69.5	99	0	0	0	0	0	0	0	0	0	0	0	0	0	0	0	0
wzm	100	100	0	0	76.894	96	78.626	99	99.265	100	0	0	93.561	100	100	100	89.627	100	100	100	0	0	0	0	0	0	0	0	0	0	0	0	0	0	0	0
wcbD	99.691	100	0	0	69.974	100	68.668	100	100	100	0	0	92.95	100	100	100	83.713	100	99.739	100	0	0	0	0	0	0	0	0	0	0	0	0	0	0	0	0
wcbB	100	100	0	0	66.234	100	66.927	99	100	100	0	0	90.078	100	99.722	100	81.004	99	100	100	0	0	0	0	0	0	0	0	0	0	0	0	0	0	0	0
wcbC	100	100	0	0	81.792	99	82.37	99	100	100	0	0	73.958	97	100	100	76.261	100	73.368	91	0	0	0	0	0	0	0	0	0	0	0	0	0	0	0	0
wcbS	100	100	86.885	97	79.139	99	80.132	98	100	100	0	0	91.776	100	100	100	96.053	99	100	100	0	0	0	0	0	0	0	0	0	0	0	0	0	0	0	0
wcbQ	99.805	88	66.049	94	66.129	97	66.802	97	100	100	0	0	91.194	100	100	100	72.222	99	99.804	100	0	0	0	0	0	0	0	0	0	0	0	0	0	0	0	0
wcbO	99.703	100	65.075	98	68.448	99	68.957	99	100	100	0	0	93.267	96	100	100	70	99	100	100	0	0	0	0	0	0	0	0	0	0	0	0	0	0	0	0
VFG026060:BTH_I1344	71.498	92	63.801	98	67.157	96	69.118	96	86.522	100	0	0	87.215	91	86.522	99	72.021	79	100	100	0	0	0	0	0	0	0	0	0	0	0	0	0	0	0	0
VFG002545:BPSL2786	71.498	92	68.159	89	66.667	96	67.157	96	100	100	0	0	82.609	96	100	100	69.948	79	86.522	100	0	0	0	0	0	0	0	0	0	0	0	0	0	0	0	0
VFG026052:BMA2286	71.498	92	68.159	89	66.667	96	67.157	96	100	100	0	0	82.609	96	100	99	69.948	79	86.522	100	0	0	0	0	0	0	0	0	0	0	0	0	0	0	0	0
VFG026051:Bcenmc03_0754	94.222	99	84.434	94	64.039	96	65.025	96	69.378	90	0	0	70.792	84	69.378	90	62.963	77	69.756	89	0	0	0	0	0	0	0	0	0	0	0	0	0	0	0	0
VFG026324:Bcenmc03_0748	66.567	99	65.337	98	66.496	99	65.217	99	66.084	99	0	0	67.164	96	64.912	99	66.107	99	66.418	100	0	0	0	0	0	0	0	0	0	0	0	0	0	0	0	0
VFG026050:BCAL3217	87.5	99	83.019	94	65.347	95	63.679	99	69.266	94	0	0	72.549	85	69.266	94	63.83	77	69.585	94	0	0	0	0	0	0	0	0	0	0	0	0	0	0	0	0
VFG026048:Bcen_0302	100	100	84.689	93	65.174	95	67.327	95	71.498	90	0	0	71.569	85	71.498	89	64.894	77	71.498	90	0	0	0	0	0	0	0	0	0	0	0	0	0	0	0	0
wzt2	100	100	43.655	98	72.642	98	73.113	98	99.533	100	0	0	90.566	100	99.533	100	74.528	98	97.419	99	0	0	0	0	0	0	0	0	0	0	44.262	89	41.216	92	51.643	97
bspR3	0	0	0	0	45.887	99	0	0	100	100	0	0	92.609	100	100	100	42.424	74	99.556	100	0	0	0	0	0	0	0	0	0	0	0	0	48.75	100	42.735	87
wcbP	0	0	79.31	100	73.946	99	76.087	90	100	100	0	0	90.421	100	100	100	75.862	99	100	100	0	0	0	0	0	0	0	0	0	0	0	0	0	0	50	48
bspR4	0	0	0	0	0	0	0	0	100	100	0	0	92.437	54	100	100	54.839	70	100	100	52.83	93	0	0	0	0	0	0	0	0	0	0	0	0	0	0
bspR2	40.171	98	0	0	0	0	70.513	100	44.498	87	0	0	52.381	91	99.524	100	53.448	94	100	100	51.852	95	0	0	0	0	0	0	0	0	0	0	0	0	0	0
VFG025336:BTH_II0859	0	0	0	0	0	0	0	0	90.756	92	0	0	89.076	92	90.756	92	0	0	100	92	40.367	86	0	0	0	0	0	0	0	0	0	0	0	0	0	0
bsaZ	0	0	0	0	0	0	0	0	100	100	0	0	90.289	100	100	100	0	0	100	100	0	0	0	0	0	0	0	0	0	0	0	0	0	0	0	0
bsaY	0	0	0	0	0	0	0	0	100	100	0	0	90.688	100	100	100	0	0	100	100	0	0	0	0	0	0	0	0	0	0	0	0	0	0	0	0
bsaO	0	0	0	0	0	0	0	0	100	100	0	0	95.252	54	100	100	0	0	100	100	0	0	0	0	0	0	0	0	0	0	0	0	0	0	0	0
bprB	0	0	0	0	0	0	0	0	100	100	0	0	91.928	100	100	100	0	0	99.533	100	0	0	0	0	0	0	0	0	0	0	0	0	0	0	0	0
basJ	0	0	0	0	0	0	0	0	100	100	0	0	80.38	100	100	100	0	0	100	100	0	0	0	0	0	0	0	0	0	0	0	0	0	0	0	0
VFG002484: tagC-5	0	0	0	0	0	0	0	0	99.528	100	0	0	78.512	99	100	98	0	0	76.423	98	0	0	0	0	0	0	0	0	0	0	0	0	0	0	0	0
VFG025320:tssH	0	0	0	0	0	0	0	0	99.528	100	0	0	77.551	99	98.419	98	0	0	75.502	98	0	0	0	0	0	0	0	0	0	0	0	0	0	0	0	0
VFG025326:BURPS668_A2133	0	0	0	0	0	0	0	0	99.528	100	0	0	81.604	88	99.057	83	0	0	81.132	84	0	0	0	0	0	0	0	0	0	0	0	0	0	0	0	0
VFG025325:BURPS1710b_A0544	0	0	0	0	0	0	0	0	99.057	100	0	0	78.512	99	99.609	100	0	0	76.829	98	0	0	0	0	0	0	0	0	0	0	0	0	0	0	0	0
VFG025321:BMA10229_0725	0	0	0	0	0	0	0	0	100	100	0	0	81.604	88	99.528	83	0	0	80.66	84	0	0	0	0	0	0	0	0	0	0	0	0	0	0	0	0
VFG025324:BURPS1106A_A2035	0	0	0	0	0	0	0	0	99.057	100	0	0	81.132	88	98.585	83	0	0	80.66	84	0	0	0	0	0	0	0	0	0	0	0	0	0	0	0	0
VFG025328:BTH_II0860	0	0	0	0	0	0	0	0	83.099	100	0	0	81.69	89	76.692	100	0	0	100	100	0	0	0	0	0	0	0	0	0	0	0	0	0	0	0	0
pilS	0	0	0	0	0	0	0	0	100	100	0	0	92.432	94	100	100	0	0	100	92	90.27	100	0	0	0	0	0	0	0	0	0	0	0	0	0	0
VFG002483: tagB-5	0	0	0	0	0	0	0	0	99.153	100	0	0	80.226	99	100	100	0	0	84.746	100	0	0	0	0	0	0	0	0	0	0	0	0	0	0	0	0
VFG002482: tagAB-5	0	0	0	0	0	0	0	0	99.432	100	0	0	66.438	99	100	100	0	0	76.212	100	0	0	0	0	0	0	0	0	0	0	0	0	0	0	0	0
VFG025317:BURPS668_A2132	0	0	0	0	0	0	0	0	98.87	100	0	0	79.944	99	99.153	100	0	0	84.463	100	0	0	0	0	0	0	0	0	0	0	0	0	0	0	0	0
VFG025309:BURPS668_A2131	0	0	0	0	0	0	0	0	99.432	100	0	0	66.323	99	99.773	100	0	0	75.959	100	0	0	0	0	0	0	0	0	0	0	0	0	0	0	0	0
VFG025316:BURPS1710b_A0543	0	0	0	0	0	0	0	0	99.435	100	0	0	80.226	99	99.718	100	0	0	84.746	100	0	0	0	0	0	0	0	0	0	0	0	0	0	0	0	0
VFG025308:BURPS1710b_A0542	0	0	0	0	0	0	0	0	99.432	100	0	0	66.208	99	99.545	100	0	0	75.986	100	0	0	0	0	0	0	0	0	0	0	0	0	0	0	0	0
VFG025315:BURPS1106A_A2034	0	0	0	0	0	0	0	0	98.87	100	0	0	80.226	99	99.153	100	0	0	84.746	100	0	0	0	0	0	0	0	0	0	0	0	0	0	0	0	0
VFG025307:BURPS1106A_A2033	0	0	0	0	0	0	0	0	99.091	100	0	0	66.018	99	99.205	100	0	0	76.357	100	0	0	0	0	0	0	0	0	0	0	0	0	0	0	0	0
VFG025311:BTH_II0862	0	0	0	0	0	0	0	0	74.83	100	0	0	70.264	99	75.17	100	0	0	100	100	0	0	0	0	0	0	0	0	0	0	0	0	0	0	0	0
VFG025319:BTH_II0861	0	0	0	0	0	0	0	0	84.181	100	0	0	83.898	99	84.181	100	0	0	99.435	100	0	0	0	0	0	0	0	0	0	0	0	0	0	0	0	0
VFG025304:BMA10229_0723	0	0	0	0	0	0	0	0	100	100	0	0	66.208	99	99.432	100	0	0	75.874	100	0	0	0	0	0	0	0	0	0	0	0	0	0	0	0	0
VFG025312:BMA10229_0724	0	0	0	0	0	0	0	0	100	100	0	0	80.226	99	99.153	100	0	0	84.746	100	0	0	0	0	0	0	0	0	0	0	0	0	0	0	0	0
VFG025267:BTH_II0867	0	0	0	0	0	0	0	0	87.681	90	0	0	83.75	100	87.681	90	0	0	100	100	0	0	0	0	40	41	0	0	0	0	0	0	0	0	0	0
VFG002477: tssE-5	0	0	0	0	0	0	0	0	99.346	100	0	0	80.153	84	100	100	0	0	87.023	82	0	0	0	0	0	0	0	0	0	0	0	0	0	0	0	0
VFG002476: tssD-5	0	0	0	0	0	0	0	0	99.408	100	0	0	0	0	100	100	0	0	0	0	0	0	0	0	0	0	0	0	0	0	0	0	0	0	0	0
VFG025259:tssC	0	0	0	0	0	0	0	0	100	100	0	0	81.159	88	99.346	100	0	0	87.681	86	0	0	0	0	0	0	0	0	0	0	0	0	0	0	0	0
VFG025250:hcp1	0	0	0	0	0	0	0	0	100	100	0	0	0	0	99.408	100	0	0	0	0	0	0	0	0	0	0	0	0	0	0	0	0	0	0	0	0
VFG025265:BURPS668_A2126	0	0	0	0	0	0	0	0	98.039	100	0	0	80.153	84	98.693	100	0	0	87.023	82	0	0	0	0	0	0	0	0	0	0	0	0	0	0	0	0
VFG025261:BMA10247_A1676	0	0	0	0	0	0	0	0	99.346	100	0	0	80.435	88	98.693	100	0	0	87.681	86	0	0	0	0	0	0	0	0	0	0	0	0	0	0	0	0
VFG025264:BURPS1710b_A0537	0	0	0	0	0	0	0	0	98.693	100	0	0	79.389	84	99.346	100	0	0	86.26	82	0	0	0	0	0	0	0	0	0	0	0	0	0	0	0	0
VFG001394:plcD	0	0	0	0	0	0	41.667	44	0	0	0	0	0	0	0	0	0	0	0	0	40.656	40	0	0	0	0	0	0	0	0	0	0	0	0	0	0
bspR5	42.128	97	0	0	0	0	64.789	99	100	100	0	0	93.671	100	100	100	53.448	94	100	100	62.869	100	41.102	99	0	0	0	0	0	0	0	0	0	0	0	0
boaB	56.901	63	0	0	0	0	41.228	73	65.247	93	0	0	48.718	98	100	100	53.521	63	46.067	44	68.201	99	51.861	66	0	0	0	0	0	0	0	0	41.667	84	0	0
spaP	41.892	95	0	0	0	0	0	0	100	100	42.342	95	96.957	100	100	100	42.342	95	100	100	41.593	96	42.342	95	0	0	0	0	0	0	0	0	0	0	0	0
boaA	54.8	80	0	0	50.927	88	52.987	98	100	96	42.962	40	66.879	100	100	97	54.348	99	47.191	44	58.989	99	57.093	77	0	0	0	0	0	0	0	0	0	0	0	0
bspI3	44.199	89	44.199	89	0	0	41.799	90	100	100	43.75	88	89.109	100	100	100	44.199	89	100	100	45.055	89	43.094	89	0	0	0	0	0	0	0	0	40.397	72	49.239	78
fliK	100	100	70.953	98	0	0	0	0	100	100	61.243	72	73.996	100	100	100	82.276	98	100	100	68.621	63	65.525	90	0	0	0	0	0	0	0	0	0	0	0	0
VFG014116:PA3142	0	0	0	0	0	0	55.208	41	70.833	40	41.026	52	0	0	43.103	46	44.792	43	41.176	97	0	0	65.625	50	0	0	0	0	0	0	0	0	0	0	0	0
pmlR/bspR1	100	100	96.653	100	0	0	76.419	66	100	100	95.397	100	95.397	100	100	100	62.069	94	100	100	89.54	100	95.397	100	0	0	0	0	0	0	0	0	0	0	0	0
bspI2	47.692	95	49.231	95	0	0	51.531	96	49.223	94	47.449	91	49.223	94	100	100	48.705	94	99.515	100	46.667	95	50	86	0	0	0	0	0	0	0	0	0	0	0	0
pmlI/bspI1	100	100	95.05	100	0	0	75.369	100	100	100	78.218	95	95.074	100	100	100	97.525	100	100	100	85.149	100	90.594	100	0	0	0	0	0	0	0	0	0	0	0	0
VFG002454:bsaX	41.429	76	0	0	0	0	0	0	100	100	40	76	98.81	100	100	100	41.429	76	100	100	43.662	77	42.857	76	45.205	82	45.205	82	0	0	0	0	0	0	0	0
VFG025362:BTH_II0856	0	0	0	0	0	0	0	0	87.111	100	0	0	76.577	94	86.667	100	0	0	100	100	0	0	0	0	0	0	0	0	0	0	0	0	0	0	0	0
VFG025360:BURPS668_A2137	0	0	0	0	0	0	0	0	99.548	100	0	0	77.523	94	99.095	100	0	0	85.333	99	0	0	0	0	0	0	0	0	0	0	0	0	0	0	0	0
VFG025354:tssL	0	0	0	0	0	0	0	0	100	100	0	0	77.982	94	99.548	100	0	0	85.778	99	0	0	0	0	0	0	0	0	0	0	0	0	0	0	0	0
VFG002321:fliC	49.068	41	45.679	59	45.342	41	45.963	41	50.311	41	42.991	41	40.05	100	0	0	0	0	50.311	41	41.315	74	50	61	0	0	49.425	100	0	0	49.412	61	0	0	0	0
VFG007528:flaB	0	0	0	0	0	0	0	0	0	0	0	0	42.077	58	0	0	0	0	44.681	94	0	0	0	0	0	0	42.169	95	43.396	42	0	0	42.767	42	42.767	42
flaA	53.416	41	45.963	58	48.466	42	49.689	41	55.901	41	0	0	50.311	41	47.368	41	54.037	41	50.625	42	49.689	57	50	60	53.416	42	52.874	100	51.852	85	52.903	56	53.125	42	53.125	42
VFG026327:BTH_I1330	0	0	0	0	0	0	0	0	0	0	0	0	90	93	0	0	80.962	93	100	95	0	0	0	0	0	0	0	0	0	0	0	0	0	0	0	0
VFG000817:escJ	0	0	0	0	0	0	0	0	0	0	0	0	41.053	76	0	0	0	0	0	0	0	0	0	0	0	0	0	0	0	0	0	0	0	0	0	0
flgA	100	77	0	0	75.688	40	78.469	41	100	100	85.922	53	86.59	49	99.607	100	87.629	68	99.814	100	90.821	48	85.507	48	75.243	42	75.243	42	70.093	41	75.728	49	76.214	41	76.699	41
VFG018314:stfD	0	0	40.09	88	0	0	0	0	0	0	0	0	0	0	0	0	0	0	0	0	0	0	0	0	0	0	0	0	0	0	0	0	0	0	0	0
VFG000873:fimA	45.752	86	45.395	86	0	0	0	0	0	0	42.484	84	41.176	60	41.83	86	44.444	86	0	0	43.791	86	0	0	0	0	0	0	0	0	0	0	0	0	0	0
VFG021735:pegB	0	0	43.056	56	45.455	52	0	0	0	0	0	0	0	0	0	0	43.75	51	0	0	0	0	0	0	0	0	0	0	0	0	0	0	0	0	0	0
VFG025258:BTH_II0868	0	0	0	0	0	0	0	0	0	0	0	0	96.296	100	0	0	0	0	100	100	0	0	0	0	0	0	0	0	0	0	0	0	0	0	0	0
VFG002488: tssL-5	0	0	0	0	0	0	0	0	99.535	97	0	0	77.358	91	100	97	0	0	85.388	97	0	0	0	0	0	0	0	0	0	0	0	0	0	0	0	0
pilT	40.991	42	40.991	42	44.186	41	42.593	40	100	100	40.541	42	98.37	100	100	100	40.909	44	100	93	97.959	93	40.936	40	40.807	43	40.807	43	40.26	41	0	0	43.21	40	40.807	40
VFG002487: tssK-5	0	0	0	0	0	0	0	0	99.785	100	0	0	84.086	98	100	100	0	0	92.672	100	0	0	0	0	0	0	0	0	0	0	0	0	0	0	0	0
VFG002479: tssG-5	0	0	0	0	0	0	0	0	99.412	100	0	0	87.611	100	100	98	0	0	90.379	100	0	0	0	0	0	0	0	0	0	0	0	0	0	0	0	0
VFG002475: tssC-5	42.348	95	42.138	95	42.558	95	47.894	88	100	100	42.767	95	90.02	99	100	100	47.45	82	92.585	100	48	75	48.165	94	45.266	86	45.266	86	47.007	88	0	0	44.444	86	41.935	93
VFG002474: tssB-5	0	0	0	0	0	0	0	0	99.39	100	0	0	84.756	96	100	100	0	0	89.634	100	0	0	0	0	0	0	0	0	0	0	0	0	0	0	0	0
VFG025345:tssK	0	0	0	0	0	0	0	0	100	100	0	0	83.871	98	99.785	100	0	0	92.457	100	0	0	0	0	0	0	0	0	0	0	0	0	0	0	0	0
VFG025277:tssE	0	0	0	0	0	0	0	0	100	100	0	0	87.021	100	99.412	98	0	0	90.087	100	0	0	0	0	0	0	0	0	0	0	0	0	0	0	0	0
VFG025232:tssA	0	0	0	0	0	0	0	0	100	100	0	0	85.366	96	99.39	100	0	0	90.244	100	0	0	0	0	0	0	0	0	0	0	0	0	0	0	0	0
VFG018530:spaR	0	0	0	0	0	0	0	0	42.731	91	0	0	40.693	93	43.172	91	0	0	42.291	90	0	0	0	0	0	0	0	0	0	0	0	0	0	0	0	0
VFG013765:pilA	0	0	41.096	43	40.278	40	40.278	40	0	0	41.096	47	0	0	40.278	43	0	0	40.278	43	0	0	0	0	0	0	0	0	0	0	0	0	0	0	0	0
VFG015459:hcp1	0	0	40.854	99	43.137	93	47.205	99	46.25	98	43.75	98	45.625	98	47.826	99	0	0	47.826	99	45.625	98	0	0	0	0	0	0	0	0	0	0	49.686	98	60	49
VFG025351:BURPS668_A2136	0	0	0	0	0	0	0	0	99.355	100	0	0	84.301	98	99.57	100	0	0	92.672	100	0	0	0	0	0	0	0	0	0	0	0	0	0	0	0	0
VFG025283:BURPS668_A2128	0	0	0	0	0	0	0	0	98.529	100	0	0	87.87	99	99.118	98	0	0	90.671	100	0	0	0	0	0	0	0	0	0	0	0	0	0	0	0	0
VFG025350:BURPS1710b_A0545	0	0	0	0	0	0	0	0	99.57	100	0	0	83.94	99	99.785	100	0	0	92.657	99	0	0	0	0	0	0	0	0	0	0	0	0	0	0	0	0
VFG025282:BURPS1710b_A0539	0	0	0	0	0	0	0	0	98.824	100	0	0	88.201	100	99.412	98	0	0	90.962	100	0	0	0	0	0	0	0	0	0	0	0	0	0	0	0	0
VFG025246:BURPS1710b_A0534	42.348	95	42.138	95	42.558	95	47.894	88	100	100	42.767	95	90.02	99	100	100	47.45	82	92.585	100	50	70	48.165	94	45.266	86	47.007	86	47.007	88	0	0	44.444	86	41.935	93
VFG025349:BURPS1106A_A2038	0	0	0	0	0	0	0	0	99.785	100	0	0	83.974	99	100	100	0	0	92.672	100	0	0	0	0	0	0	0	0	0	0	0	0	0	0	0	0
VFG025281:BURPS1106A_A2030	0	0	0	0	0	0	0	0	99.412	100	0	0	87.87	99	100	100	0	0	90.379	100	0	0	0	0	0	0	0	0	0	0	0	0	0	0	0	0
VFG025240:BTH_II0870	0	0	0	0	0	0	0	0	90.244	100	0	0	85.366	96	89.634	100	0	0	100	100	0	0	0	0	0	0	0	0	0	0	0	0	0	0	0	0
VFG025249:BTH_II0869	41.807	95	41.597	95	42.227	95	47.228	88	92.786	100	42.647	95	93.413	99	92.786	100	46.563	82	99.8	100	47.887	70	47.706	94	45.676	86	46.341	86	46.563	88	0	0	44.444	86	41.29	93
VFG025285:BTH_II0865	0	0	0	0	0	0	0	0	90.087	100	0	0	88.304	100	90.313	100	0	0	100	100	0	0	0	0	0	0	0	0	0	0	0	0	0	0	0	0
VFG025353:BTH_II0857	0	0	0	0	0	0	0	0	92.672	99	0	0	85.529	98	92.888	99	0	0	99.784	100	0	0	0	0	0	0	0	0	0	0	0	0	0	0	0	0
VFG025242:BMA10229_0716	42.348	95	42.138	95	42.558	95	47.894	88	100	100	42.767	95	90.02	99	100	100	47.45	82	92.585	100	48.131	92	48.165	94	45.266	86	45.266	86	47.007	88	0	0	44.444	86	41.935	93
VFG025346:BMA10229_0728	0	0	0	0	0	0	0	0	100	100	0	0	83.94	99	99.785	100	0	0	92.457	100	0	0	0	0	0	0	0	0	0	0	0	0	0	0	0	0
gmhA	0	0	0	0	40	82	0	0	99.13	100	0	0	0	0	99.479	100	0	0	40.588	87	0	0	0	0	49.462	95	49.462	95	54.971	88	46.448	94	51.613	95	50	95
pilQ	40.097	46	0	0	0	0	0	0	100	100	0	0	94.653	94	100	100	0	0	99.814	100	95.644	96	0	0	40.786	68	40.786	68	40.75	74	40.852	78	40.657	66	40.244	71
bimA	0	0	0	0	42.512	50	0	0	99.16	100	42.211	80	91.597	100	100	100	0	0	99.465	100	0	0	0	0	0	0	43.023	65	0	0	42.553	42	0	0	0	0
VFG026310:BTH_I1334	0	0	0	0	55.699	89	53.756	98	0	0	0	0	80.51	100	0	0	62.319	99	100	100	0	0	0	0	0	0	0	0	0	0	0	0	0	0	0	0
VFG026307:Bcen2424_0772	100	93	0	0	48.862	90	49.212	82	0	0	0	0	0	0	0	0	51.82	85	0	0	0	0	0	0	0	0	0	0	0	0	54.85	91	52.548	78	0	0
VFG011332:fliO	43.75	41	42.5	44	43.182	43	41.25	41	0	0	41.25	42	0	0	0	0	44.304	42	0	0	41.463	46	40.909	46	0	0	0	0	0	0	0	0	0	0	0	0
VFG013221:flp1	47.273	83	40.58	99	0	0	0	0	0	0	0	0	0	0	0	0	50.909	83	0	0	0	0	0	0	44.444	86	0	0	0	0	0	0	0	0	0	0
VFG011265:flgM	40.196	94	0	0	0	0	0	0	0	0	0	0	0	0	0	0	40.196	94	0	0	0	0	40	94	41.176	70	41.176	70	0	0	51.389	57	0	0	0	0
virB11	0	0	0	0	41.84	97	0	0	0	0	0	0	0	0	0	0	0	0	0	0	0	0	0	0	41.951	44	0	0	40.127	45	0	0	41.04	91	40.816	90
VFG018746: vblB10	0	0	0	0	41.096	95	0	0	0	0	0	0	0	0	0	0	0	0	0	0	0	0	0	0	0	0	0	0	0	0	0	0	0	0	41.071	54
trwE	43.062	97	0	0	40.191	92	0	0	0	0	0	0	0	0	0	0	0	0	0	0	0	0	41.27	97	0	0	0	0	0	0	0	0	42.13	52	40.465	56
VFG011095:ptlB	0	0	0	0	41.905	96	0	0	0	0	0	0	0	0	0	0	0	0	0	0	0	0	0	0	0	0	0	0	40.385	81	0	0	44.66	91	40.952	93
virB3	0	0	0	0	44.118	94	0	0	0	0	0	0	0	0	0	0	0	0	0	0	0	0	42.157	94	0	0	0	0	44.118	79	0	0	42.157	91	42.157	91
virB9	47.368	90	0	0	42.213	93	0	0	0	0	0	0	0	0	0	0	0	0	0	0	0	0	44.309	97	0	0	0	0	41.633	83	0	0	40.664	81	42.975	81
virB4	47.4	97	0	0	47.002	98	0	0	0	0	0	0	0	0	0	0	0	0	0	0	0	0	48.507	98	0	0	0	0	47.758	97	0	0	47.585	99	48.485	98
virB2	43.478	83	0	0	40.244	71	0	0	0	0	0	0	0	0	0	0	0	0	0	0	0	0	42.254	63	0	0	0	0	44.615	84	0	0	44.615	86	45	92
trwK	44.294	96	0	0	44.471	96	0	0	0	0	0	0	0	0	0	0	0	0	0	0	0	0	45.194	98	0	0	0	0	45.655	96	0	0	45.153	96	45.285	95
virB10	46.231	94	0	0	43.779	96	0	0	0	0	0	0	0	0	0	0	0	0	0	0	0	0	46.561	98	0	0	0	0	46.262	56	0	0	48.058	51	46.602	81
VFG019117:SPH_0460	0	0	0	0	0	0	0	0	0	0	0	0	0	0	0	0	0	0	0	0	0	0	0	0	41.071	95	41.096	95	0	0	0	0	50.526	87	41.379	95
VFG012906:gspI	0	0	40.351	46	0	0	0	0	0	0	0	0	0	0	0	0	0	0	0	0	0	0	0	0	45.614	42	45.614	43	42.857	41	0	0	41.071	42	41.071	42
vapA1	0	0	0	0	60	74	0	0	0	0	0	0	42.424	85	0	0	59.259	81	0	0	58.025	81	0	0	48.193	55	48.193	55	47.619	56	0	0	46.988	55	46.429	56
vapA5	50.649	77	0	0	52	77	0	0	0	0	0	0	0	0	0	0	47.143	65	0	0	55.556	72	0	0	40.845	47	40.845	47	42.857	46	0	0	42.857	46	41.429	46
VFG016798:vapA2	53.571	83	42.254	90	50.549	92	0	0	0	0	0	0	0	0	0	0	47.059	79	0	0	49.451	90	0	0	0	0	0	0	0	0	0	0	0	0	0	0
VFG018755:vapA4	55.952	83	42.623	79	54.023	84	0	0	0	0	0	0	0	0	0	0	51.22	77	0	0	55.422	83	0	0	42.857	46	42.857	46	44.286	46	0	0	44.286	46	42.857	46
