# Supplementary material for: Comprehensive genome analysis of a pangolin-associated Paraburkholderia fungorum provides new insights into its secretion systems and virulence
Source: PeerJ. 2020 Sep 3;8:e9733. doi: 10.7717/peerj.9733 (PMC7474880; doi:10.7717/peerj.9733)
Supplement: Supplemental Information 5 [file peerj-08-9733-s005.xlsx]

## Sheet: Sheet1
Supplemental Table 1: Genomic Islands predicted by IslandViewer in the genome of pangolin Pf.
GIs	Genomic Length (bp)	Predicted key genes and gene products
GI1	5254	Outer membrane protein (porin)
		Response regulators consisting of a CheY-like receiver domain and a winged-helix DNA-binding domain
		Signal transduction histidine kinase
		DNA-binding heavy metal response regulator
		RND efflux system, inner membrane transporter CmeB
GI2	9495	Branched-chain amino acid transport ATP-binding protein LivF (TC 3.A.1.4.1)
		hypothetical protein
		hypothetical protein
		hypothetical protein
		Lytic enzyme
GI3	4773	Lipid A export ATP-binding/permease protein MsbA
GI4	11822	Lipopolysaccharide biosynthesis protein WzxC
		Tyrosine-protein kinase Wzc (EC 2.7.10.2)
		Beta-xylosidase
		putative membrane protein
		FIG00457784: hypothetical protein
		Glycosyl transferase, group 2 family protein
		Glycosyltransferase (EC 2.4.1.-)
		FIG00457824: hypothetical protein
		Methyl-accepting chemotaxis protein I (serine chemoreceptor protein)
GI5	21074	Dihydroorotase (EC 3.5.2.3)
		Aspartate carbamoyltransferase (EC 2.1.3.2)
		Uracil phosphoribosyltransferase (EC 2.4.2.9) / Pyrimidine operon regulatory protein PyrR
		Putative Holliday junction resolvase YggF
		UPF0301 protein YqgE
		hypothetical protein
		FIG00455362: hypothetical protein
		Rubredoxin
		hypothetical protein
		Hydroxymethylpyrimidine phosphate kinase ThiD (EC 2.7.4.7)
		Adenylylsulfate kinase (EC 2.7.1.25)
		Heat shock protein 60 family chaperone GroEL
		Heat shock protein 60 family co-chaperone GroES
		Hydrolases of the alpha/beta superfamily
		Sco1/SenC/PrrC protein family
		Galactose oxidase precursor (EC 1.1.3.9)
		hypothetical protein
		hypothetical protein
		FIG00453412: hypothetical protein
GI6	5345	serine/threonine protein kinase
		Amino acid transporters
		3-oxoacyl-[acyl-carrier protein] reductase (EC 1.1.1.100)
		Ethanolamine operon regulatory protein
		benzoate MFS transporter BenK
GI7	61947	transcriptional regulator, AraC type; possible DNA gyrase inhibitor
		Retron-type RNA-directed DNA polymerase (EC 2.7.7.49)
		FIG00464863: hypothetical protein
		hypothetical protein
		hypothetical protein
GI8	17241	Xylulose kinase (EC 2.7.1.17)
		3-oxoacyl-[acyl-carrier protein] reductase (EC 1.1.1.100)
		FIG00459084: hypothetical protein
		Channel-forming transporter/cytolysins activator of TpsB family
		Putative large exoprotein involved in heme utilization or adhesion of ShlA/HecA/FhaA family
		hypothetical protein
		RstR phage-related transcriptional repressor
		hypothetical protein
		Tryptophan 2,3-dioxygenase (EC 1.13.11.11)
GI9	6725	DNA-binding response regulator, LuxR family
		Signal transduction histidine kinase
		hypothetical protein
		transcriptional regulator, SARP family
GI10	15500	ClpB protein
		hypothetical protein
		VgrG protein
		Uncharacterized protein ImpI/VasC
		Type VI secretion lipoprotein/VasD
		Uncharacterized protein ImpJ/VasE
		Outer membrane protein ImpK/VasF, OmpA/MotB domain
		IcmF-related protein
		Protein phosphatase ImpM
		Protein serine/threonine phosphatase PrpC, regulation of stationary phase
		hypothetical protein
		Putative transport protein
		Acyl-CoA dehydrogenase family protein
GI11	17110	hypothetical protein
		Indolepyruvate ferredoxin oxidoreductase, alpha and beta subunits
GI12	10689	Alkyl hydroperoxide reductase subunit C-like protein
		Chlorogenate esterase
		hypothetical protein
		Polysaccharide deacetylase
		Transcriptional regulatory protein rstA
		probable two-component sensor
		Endoglucanase Y
		Glycosyltransferase
		hypothetical protein
GI13	198705	hypothetical protein
		hypothetical protein
		Cell division protein FtsL
		ATPase involved in DNA repair
		DinG family ATP-dependent helicase YoaA
		hypothetical protein
		FIG002776: hypothetical protein
		hypothetical protein
		FKBP-type peptidyl-prolyl cis-trans isomerase SlyD (EC 5.2.1.8)
		Probable transmembrane protein
		DNA mismatch repair protein MutS
		Probable transmembrane protein
		Inositol-1-monophosphatase (EC 3.1.3.25)
		tRNA:Cm32/Um32 methyltransferase
		Serine acetyltransferase (EC 2.3.1.30)
		UDP-2,3-diacylglucosamine diphosphatase (EC 3.6.1.54)
		Peptidyl-prolyl cis-trans isomerase PpiB (EC 5.2.1.8)
		Peptidyl-prolyl cis-trans isomerase PpiA precursor (EC 5.2.1.8)
		FOG: TPR repeat
		Cysteinyl-tRNA synthetase (EC 6.1.1.16)
		DNA-3-methyladenine glycosylase II (EC 3.2.2.21)
		Acetyl-coenzyme A carboxyl transferase alpha chain (EC 6.4.1.2)
		tRNA(Ile)-lysidine synthetase (EC 6.3.4.19)
		Aspartokinase (EC 2.7.2.4)
		conserved hypothetical protein
		Conjugal transfer protein traA
		Carbohydrate kinase, PfkB
		hypothetical protein
		hypothetical protein
		Integrase
		Outer membrane porin protein 32 precursor; putative 3-hydroxyphenylpropionic acid porine
GI14	11992	Phosphoenolpyruvate synthase (EC 2.7.9.2)
		Phospholipase A1 precursor (EC 3.1.1.32, EC 3.1.1.4); Outer membrane phospholipase A
		Putrescine ABC transporter putrescine-binding protein PotF (TC 3.A.1.11.2)
		Putrescine transport ATP-binding protein PotG (TC 3.A.1.11.2)
		Putrescine transport system permease protein PotH (TC 3.A.1.11.2)
		Putrescine transport system permease protein PotI (TC 3.A.1.11.2)
		Mobile element protein
		Mobile element protein
		hypothetical protein
		Methyl-accepting chemotaxis protein
		hypothetical protein
GI15	9710	hypothetical protein
		hypothetical protein
		Serine protein kinase (prkA protein), P-loop containing
		FIG002076: hypothetical protein
		FIG004684: SpoVR-like protein
		Mobile element protein
		Mobile element protein
		dicarboxylic acid transporter PcaT
		FIG00460503: hypothetical protein
GI16	5567	ABC-type nitrate/sulfonate/bicarbonate transport systems, periplasmic components
		Vanillate O-demethylase oxygenase subunit (EC 1.14.13.82)
		ABC-type nitrate/sulfonate/bicarbonate transport system, ATPase component
		Hydroxymethylpyrimidine ABC transporter, transmembrane component
		BOX elements
GI17	7453	Molybdenum cofactor biosynthesis protein MoaD
		Molybdenum cofactor biosynthesis protein MoaE
		Truncated hemoglobins
		Nitrite-sensitive transcriptional repressor NsrR
		ClpB protein
		FIG00454267: hypothetical protein
		Flagellar hook-length control protein FliK
		Transcriptional regulator, MerR family
		4-carboxymuconolactone decarboxylase (EC 4.1.1.44)
GI18	17706	PhbF
GI19	6588	Aldehyde dehydrogenase (EC 1.2.1.3)
		hypothetical protein
		Monoamine oxidase (1.4.3.4)
GI20	4696	FIG00460665: hypothetical protein
		hypothetical protein
		hypothetical protein
		hypothetical protein
		FIG00459534: hypothetical protein
		Alanyl-tRNA synthetase
GI21	19503	hypothetical protein
		Two-component response regulator
		hypothetical protein
		Thiol-disulfide isomerase and thioredoxins
		hypothetical protein
		Organic hydroperoxide resistance protein
		Acyl dehydratase
		Epoxide hydrolase (EC 3.3.2.9)
		Enoyl-CoA hydratase (EC 4.2.1.17)
		Transcriptional regulator, LysR family
		ThiJ/PfpI family protein
		FIG00455769: hypothetical protein
		Urea carboxylase-related ABC transporter, periplasmic substrate-binding protein
		Urea carboxylase-related ABC transporter, permease protein
		Urea carboxylase-related ABC transporter, ATPase protein
		Urea carboxylase-related aminomethyltransferase (EC 2.1.2.10)
		Urea carboxylase-related aminomethyltransferase (EC 2.1.2.10)
		Urea carboxylase (EC 6.3.4.6)
GI22	13540	Catalase (EC 1.11.1.6) / Peroxidase (EC 1.11.1.7)
		Protein-L-isoaspartate O-methyltransferase (EC 2.1.1.77)
		hypothetical protein
		Outer membrane protein (porin)
		hypothetical protein
		FIG00460408: hypothetical protein
		Signal transduction histidine kinase
		FOG: CheY-like receiver
		hypothetical protein
		protein of unknown function DUF1470
		Probable signal peptide protein
		Hydrolase, alpha/beta fold family protein, At1g52510/AT4G12830 homolog, group3
		hypothetical protein
		FIG00463598: hypothetical protein
		Transcriptional regulator, LysR family
		3-oxoacyl-[acyl-carrier protein] reductase (EC 1.1.1.100)
		(AJ250023) putative polyketide synthase
GI23	5610	Flavodoxin reductases (ferredoxin-NADPH reductases) family 1; Vanillate O-demethylase oxidoreductase
		hypothetical protein
		Nucleoside ABC transporter, periplasmic nucleoside-binding protein
		putative alkyl salicylate esterase
		2-Oxobutyrate oxidase, putative
		transcriptional regulator, MerR family
GI24	12679	Permeases of the major facilitator superfamily
		Sensor protein FixL (EC 2.7.3.-)
		Pigment protein
		FIG00455739: hypothetical protein
		Succinyl-CoA synthetase, alpha subunit
		Amidase (EC 3.5.1.4)
		3-oxoacyl-[acyl-carrier protein] reductase (EC 1.1.1.100)
		Two-component response regulator
		4-hydroxyphenylacetate 3-monooxygenase, reductase component (EC 1.6.8.-)
		Chromosome initiation inhibitor
		Permeases of the major facilitator superfamily
		Amidase( EC:3.5.1.4 )
		Outer membrane protein (porin)
GI25	9702	Sensory histidine kinase QseC
		Two-component system response regulator QseB
		FIG00459707: hypothetical protein
		Cobalt/zinc/cadmium efflux RND transporter, membrane fusion protein, CzcB family
		Cobalt-zinc-cadmium resistance protein CzcA; Cation efflux system protein CusA
		Mobile element protein
		cellobiose phosphotransferase system celC
GI26	10977	Transcriptional regulator, IclR family
		BarH
		Acyl-CoA dehydrogenase, long-chain specific, mitochondrial precursor (EC 1.3.99.13)
		Acyl-CoA dehydrogenase, short-chain specific (EC 1.3.99.2)
		Enoyl-CoA hydratase (EC 4.2.1.17)
		Acyl-CoA dehydrogenase, short-chain specific (EC 1.3.99.2)
		Ferredoxin, 2Fe-2S
		Cytochrome P450
		Phytoene dehydrogenase (EC 1.14.99.-)
		Transcriptional regulator, TetR family
		Short-chain dehydrogenase/reductase SDR
GI27	18743	Short-chain dehydrogenase/reductase SDR
		Acyl-CoA reductase (EC 1.2.1.50)
		acyl protein synthase/acyl-CoA reductase RfbN
		Transcriptional regulator, AraC family
		Cytochrome P450
		hypothetical protein
		hypothetical protein
		Glutathione peroxidase family protein
		3-ketoacyl-CoA thiolase (EC 2.3.1.16) @ Acetyl-CoA acetyltransferase (EC 2.3.1.9)
		3-hydroxybutyryl-CoA dehydrogenase (EC 1.1.1.157); 3-hydroxyacyl-CoA dehydrogenase (EC 1.1.1.35)
		Fumarylacetoacetate hydrolase family protein
		2-amino-3-carboxymuconate-6-semialdehyde decarboxylase (EC 4.1.1.45)
		hypothetical protein
		Transcriptional regulator, TetR family
		Long-chain-fatty-acid--CoA ligase (EC 6.2.1.3)
		Putative short-chain dehydrogenase/reductase (EC 1.1.1.100)
		FIG00962350: hypothetical protein
		Biphenyl dioxygenase beta subunit (EC 1.14.12.18)
		Large subunit naph/bph dioxygenase
GI28	9546	Large subunit naph/bph dioxygenase
		2-hydroxy-3-oxopropionate reductase (EC 1.1.1.60)
		Ketoglutarate semialdehyde dehydrogenase (EC 1.2.1.26)
		hypothetical protein
		LysR family regulatory protein
		Demethylmenaquinone methyltransferase
		2-keto-4-pentenoate hydratase/2-oxohepta-3-ene-1,7-dioic acid hydratase (catechol pathway)
		Aldehyde dehydrogenase (EC 1.2.1.3)
		Sulfopyruvate decarboxylase - alpha subunit (EC 4.1.1.79)
		Sulfopyruvate decarboxylase - beta subunit (EC 4.1.1.79)
		Putative esterase
		Phenylpropionate dioxygenase and related ring-hydroxylating dioxygenases, large terminal subunit
GI29	11406	Probable vanillate O-demethylase oxygenase subunit oxidoreductase protein (EC 1.14.13.-)
		2-amino-3-carboxymuconate-6-semialdehyde decarboxylase (EC 4.1.1.45)
		3-oxoacyl-[acyl-carrier protein] reductase (EC 1.1.1.100)
		3-oxoacyl-[acyl-carrier protein] reductase (EC 1.1.1.100)
		Predicted aminoglycoside phosphotransferase
		Butyryl-CoA dehydrogenase (EC 1.3.99.2)
		Oxidoreductase
		CAIB/BAIF family protein
		2-keto-4-pentenoate hydratase/2-oxohepta-3-ene-1,7-dioic acid hydratase (catechol pathway)
		Hemerythrin
		Sorbitol-6-phosphate 2-dehydrogenase (EC 1.1.1.140)
		Bll2959 protein
		3-ketoacyl-CoA thiolase (EC 2.3.1.16)
GI30	9818	3-ketoacyl-CoA thiolase (EC 2.3.1.16)
		Major facilitator superfamily MFS_1
		Ferredoxin reductase
		hypothetical protein
		transcriptional regulator, MerR family
		COGs COG3777
		Probable acyl-CoA dehydrogenase (EC 1.3.99.3)
		L-carnitine dehydratase/bile acid-inducible protein F (EC 2.8.3.16)
		MmgE/PrpD family protein
GI31	29155	NAD-dependent protein deacetylase of SIR2 family
		Enoyl-[acyl-carrier-protein] reductase [FMN] (EC 1.3.1.9)
		LysR-family transcriptional regulator PA4203
		Ferredoxin reductase
		hypothetical protein
		hypothetical protein
		FIG00456328: hypothetical protein
		Catalase (EC 1.11.1.6)
		FIG00458566: hypothetical protein
		DNA topoisomerase IB (poxvirus type) (EC 5.99.1.2)
		hypothetical protein
		FIG00459467: hypothetical protein
		Selenium-binding protein 1
		Taurine transport system permease protein TauC
GI32	4239	Nucleoside ABC transporter, periplasmic nucleoside-binding protein
		Amidases related to nicotinamidase
		Amidase
GI33	5832	Putative metal chaperone, involved in Zn homeostasis, GTPase of COG0523 family
		Exoenzymes regulatory protein AepA in lipid-linked oligosaccharide synthesis cluster
		Acetate permease ActP (cation/acetate symporter)
		FIG00454496: hypothetical protein
		Bll0704 protein
		major facilitator superfamily MFS_1
GI34	7162	3-oxoacyl-[acyl-carrier protein] reductase (EC 1.1.1.100)
		2-hydroxy-6-oxo-6-phenylhexa-2,4-dienoate hydrolase (EC 3.7.1.-)
		short chain dehydrogenase
		FIG067310: hypothetical protein
		FIG002188: hypothetical protein
		4-oxalocrotonate decarboxylase (EC 4.1.1.77)
		Acetaldehyde dehydrogenase, acetylating, (EC 1.2.1.10) in gene cluster for degradation of phenols, c
GI35	4046	Butyryl-CoA dehydrogenase (EC 1.3.99.2)
		short chain dehydrogenase
		3-ketoacyl-CoA thiolase (EC 2.3.1.16) @ Acetyl-CoA acetyltransferase (EC 2.3.1.9)
		Butyryl-CoA dehydrogenase (EC 1.3.99.2)
GI36	6184	Butyryl-CoA dehydrogenase (EC 1.3.99.2)
		Enoyl-CoA hydratase (EC 4.2.1.17)
		Enoyl-[acyl-carrier-protein] reductase [FMN] (EC 1.3.1.9)
		Enoyl-CoA hydratase (EC 4.2.1.17)
		3-oxoadipate CoA-transferase subunit B (EC 2.8.3.6); Glutaconate CoA-transferase subunit B (EC 2.8.3
		3-oxoadipate CoA-transferase subunit A (EC 2.8.3.6); Glutaconate CoA-transferase subunit A (EC 2.8.3
		2,3-dihydroxybiphenyl 1,2-dioxygenase
		Long-chain-fatty-acid--CoA ligase (EC 6.2.1.3)
GI37	5926	Fumarate reductase flavoprotein subunit (EC 1.3.99.1)
		4-hydroxyphenylacetate 3-monooxygenase, reductase component (EC 1.6.8.-)
		3-oxosteroid 1-dehydrogenase (EC 1.3.99.4)
		Pigment protein
		Alkanal monooxygenase alpha chain (EC 1.14.14.3)
GI38	5355	Lactoylglutathione lyase and related lyases
		FIG000557: hypothetical protein co-occurring with RecR
		Acetyl esterase (EC 3.1.1.-)
		Enoyl-CoA hydratase (EC 4.2.1.17)
		3,4-dihydroxy-2-butanone 4-phosphate synthase (EC 4.1.99.12) / GTP cyclohydrolase II (EC 3.5.4.25)
		3-oxoacyl-[acyl-carrier protein] reductase (EC 1.1.1.100)
GI39	15620	diguanylate cyclase/phosphodiesterase (GGDEF & EAL domains) with PAS/PAC sensor(s)
		FIG00462252: hypothetical protein
GI40	6836	contains type I hydrophobic transmembrane region and ATP/GTP binding motif
		ATP-dependent protease La (EC 3.4.21.53) Type I
		heat shock protein
		hypothetical protein
		FIG004454: RNA binding protein
		FIG000557: hypothetical protein co-occurring with RecR
		hypothetical protein
		Outer membrane component of tripartite multidrug resistance system
GI41	8885	Methylmalonyl-CoA mutase (EC 5.4.99.2)
		FIG071259; hypothetical protein
		3-oxoacyl-[acyl-carrier protein] reductase (EC 1.1.1.100)
		Endoribonuclease L-PSP
		low-specificity D-threonine aldolase
		PROBABLE AMINO-ACID ATP-BINDING ABC TRANSPORTER PROTEIN
		ABC-type amino acid transport system, permease component yhdY
		Glutamate Aspartate transport system permease protein GltJ (TC 3.A.1.3.4)
		Glutamine ABC transporter, periplasmic glutamine-binding protein (TC 3.A.1.3.2)
		Transcriptional regulator
		Transcriptional regulator
GI42	35652	hypothetical protein
		Bona fide RidA/YjgF/TdcF/RutC subgroup
GI43	7335	Permeases of the major facilitator superfamily
		Permeases of the major facilitator superfamily
		Nitrate/nitrite transporter
		Transcriptional regulator, LysR family
		Ribulose-5-phosphate 4-epimerase and related epimerases and aldolases
		Transcriptional regulator, HxlR family
		hypothetical protein
		Transcriptional regulator, MarR family
		Hydroxymethylpyrimidine ABC transporter, ATPase component
GI44	4069	Biopolymer transport protein ExbD/TolR
		MotA/TolQ/ExbB proton channel
		TonB-dependent receptor
		Nonspecific acid phosphatase precursor (EC 3.1.3.2)
GI45	8674	Aldehyde dehydrogenase (EC 1.2.1.3)
		Long-chain-fatty-acid--CoA ligase (EC 6.2.1.3)
		Enoyl-CoA hydratase (EC 4.2.1.17)
		Enoyl-CoA hydratase (EC 4.2.1.17)
		Hydroxyproline dehydratase putative
		Long-chain-fatty-acid--CoA ligase (EC 6.2.1.3)
		Phenylacetic acid degradation operon negative regulatory protein paaX
GI46	8430	Outer membrane protein (porin)
		Nitrate/nitrite transporter
		Phenylacetic acid degradation operon negative regulatory protein paaX
		Long-chain-fatty-acid--CoA ligase (EC 6.2.1.3)
		putative cytochrome P450 hydroxylase
		Alcohol dehydrogenase (EC 1.1.1.1)
		Aldehyde dehydrogenase (EC 1.2.1.3)
GI47	10537	Aldehyde dehydrogenase (EC 1.2.1.3)
		Transcriptional regulator, LacI family
		hypothetical protein
		hypothetical protein
		3-oxoacyl-[acyl-carrier protein] reductase (EC 1.1.1.100)
		Aspartate dehydrogenase homolog
		Possible hydrolase or acyltransferase RutD in novel pyrimidine catabolism pathway
		hypothetical protein
		Proline racemase (EC 5.1.1.4)
		polar amino acid ABC transporter, inner membrane subunit
		ABC transporter permease protein
		amino acid ABC transporter, ATP-binding protein
		ABC transporter amino acid-binding protein
GI48	9738	Benzoylformate decarboxylase (EC 4.1.1.7)
		FIG000557: hypothetical protein co-occurring with RecR
		hypothetical protein
		4-hydroxybenzoate transporter
		hypothetical protein
		GLCG PROTEIN
		Outer membrane protein (porin)
		4-hydroxybenzoate transporter
		hypothetical protein
		Predicted periplasmic or secreted lipoprotein
		hypothetical protein
GI49	11722	hypothetical protein
		FIG00458593: hypothetical protein
		hypothetical protein
		Outer membrane protein (porin)
		Outer membrane protein Imp, required for envelope biogenesis / Organic solvent tolerance protein pre
		Osmolarity sensory histidine kinase EnvZ
		hypothetical protein
		Outer membrane protein (porin)
GI50	20635	FIG00464913: hypothetical protein
		COGs COG3558
		Transcriptional regulator, TetR family
		Protein yceI precursor
		L-threonine 3-dehydrogenase (EC 1.1.1.103)
		2-amino-3-ketobutyrate coenzyme A ligase (EC 2.3.1.29)
		Predicted transcriptional regulators
		serine/threonine protein kinase
		Probable integrase/recombinase protein
		Chromosome segregation ATPases
		Replication protein
		Chromosome (plasmid) partitioning protein ParB
		Chromosome (plasmid) partitioning protein ParA
		Arsenate reductase (EC 1.20.4.1)
		ABC-type nitrate/sulfonate/bicarbonate transport systems, periplasmic components
		Gluconate transporter family protein
		FIG00461307: hypothetical protein
		FIG00452992: hypothetical protein
		DNA-directed RNA polymerase specialized sigma subunit, sigma24-like
GI51	6165	cytosolic long-chain acyl-CoA thioester hydrolase family protein
		hypothetical protein
		extracellular protease
		FOG: TPR repeat
		hypothetical protein
GI52	5049	Cytochrome O ubiquinol oxidase subunit IV (EC 1.10.3.-)
		Arylmalonate decarboxylase (EC 4.1.1.76)
		Hydroxydechloroatrazine ethylaminohydrolase (EC 3.5.99.3)
		Xanthine permease
		Putative metal chaperone, involved in Zn homeostasis, GTPase of COG0523 family
		3-polyprenyl-4-hydroxybenzoate carboxy-lyase UbiX (EC 4.1.1.-)
GI53	20411	3-polyprenyl-4-hydroxybenzoate carboxy-lyase (EC 4.1.1.-)
		Metal-dependent hydrolase (EC 3.-.-.-)
		Metal-dependent hydrolase (EC 3.-.-.-)
		Transcriptional regulators, LysR family
		Glycine cleavage system transcriptional activator
		Isoquinoline 1-oxidoreductase alpha subunit (EC 1.3.99.16)
		Isoquinoline 1-oxidoreductase beta subunit (EC 1.3.99.16)
		FIG00956879: hypothetical protein
		Aldehyde dehydrogenase (EC 1.2.1.3); Probable coniferyl aldehyde dehydrogenase (EC 1.2.1.68)
		FIG00761799: membrane protein
		Non-heme chloroperoxidase (EC 1.11.1.10)
		Nucleoside-diphosphate-sugar epimerases
GI54	42451	Glycine cleavage system transcriptional activator
		Isoquinoline 1-oxidoreductase alpha subunit (EC 1.3.99.16)
		Isoquinoline 1-oxidoreductase beta subunit (EC 1.3.99.16)
		FIG00956879: hypothetical protein
		Aldehyde dehydrogenase (EC 1.2.1.3); Probable coniferyl aldehyde dehydrogenase (EC 1.2.1.68)
		FIG00761799: membrane protein
		Non-heme chloroperoxidase (EC 1.11.1.10)
		Nucleoside-diphosphate-sugar epimerases
		FIG00459084: hypothetical protein
		hypothetical protein
		hypothetical protein
		hypothetical protein
		EAL
		hypothetical protein
		GGDEF/response regulator receiver domain protein
		FOG: GGDEF domain
		Transposase
		Pirin-like protein YhhW, possibly qercetin 2,3-dioxygenase activity
		hypothetical protein
		Predicted dinucleotide-binding enzymes
		FMN-dependent NADH-azoreductase
		Ketosteroid isomerase-related protein
		Acetoacetyl-CoA reductase (EC 1.1.1.36)
		Transcriptional regulator, HxlR family
		Glucoamylase (EC 3.2.1.3)
		Glucose 1-dehydrogenase (EC 1.1.1.47)
		hypothetical protein
		hypothetical protein
		Transcriptional regulator
		Histidyl-tRNA synthetase-related domain
		MFS permease
		hypothetical protein
		3-oxoacyl-[acyl-carrier protein] reductase (EC 1.1.1.100)
		3-oxoacyl-[acyl-carrier protein] reductase (EC 1.1.1.100)
GI55	7081	hypothetical protein
		GGDEF/response regulator receiver domain protein
		FOG: GGDEF domain
		Transposase
		Pirin-like protein YhhW, possibly qercetin 2,3-dioxygenase activity
		hypothetical protein
		Predicted dinucleotide-binding enzymes
		FMN-dependent NADH-azoreductase
		Ketosteroid isomerase-related protein
GI56	4509	Transcriptional regulator
		Histidyl-tRNA synthetase-related domain
		MFS permease
		hypothetical protein
		3-oxoacyl-[acyl-carrier protein] reductase (EC 1.1.1.100)
GI57	8041	Transcriptional regulator, TetR family
		NAD-dependent epimerase/dehydratase
		hypothetical protein
		Salicylate hydroxylase (EC 1.14.13.1)
		Nucleoside-diphosphate-sugar epimerases
		2,4-dienoyl-CoA reductase [NADPH] (EC 1.3.1.34)
GI58	8991	Non-heme chloroperoxidase (EC 1.11.1.10)
		Mercuric resistance operon regulatory protein
		hypothetical protein
		Mercuric resistance operon regulatory protein
		ThiJ/PfpI family protein
		blr4874; putative alcohol dehydrogenase (EC 1.1.1.1)
		putative DNA-binding protein
		Redox-sensing transcriptional regulator QorR, putative
		NADPH:quinone oxidoreductase 2
		Transcriptional regulator, DeoR family
		hypothetical protein
		hypothetical protein
		hypothetical protein
GI59	7223	putative esterase
		Transcriptional regulator, AraC family
		Endoribonuclease L-PSP
		FIG00974299: hypothetical protein
		Niacin transporter NiaP
		Hypothetical transcriptional regulator YqhC
		Short-chain dehydrogenase/reductase SDR
		Glycine cleavage system transcriptional activator
GI60	5906	Transcriptional regulator
		TrpBA operon transcriptional activator
		Adenylosuccinate synthetase (EC 6.3.4.4)
		hypothetical protein
		Maltose O-acetyltransferase (EC 2.3.1.79)
		hypothetical protein
		RidA/YER057c/UK114 superfamily, group 2, YoaB-like protein
		Histone acetyltransferase HPA2 and related acetyltransferases
		hypothetical protein
		Amidases related to nicotinamidase
GI61	4318	Putative auxin-binding protein
		Putative metal chaperone, involved in Zn homeostasis, GTPase of COG0523 family
		Ribonuclease Z (EC 3.1.26.11)
		Transcriptional regulator, LysR family
		Haloacetate dehalogenase H-1 (EC 3.8.1.3)
		3-isopropylmalate dehydratase large subunit (EC 4.2.1.33)
GI62	6351	Short-chain dehydrogenase/reductase SDR
		LysR family transcriptional regulator PA2877
		sensor histidine kinase/response regulator LuxN
		FOG: CheY-like receiver
		8-amino-7-oxononanoate synthase (EC 2.3.1.47)
		Methyl-accepting chemotaxis protein
GI63	7332	Aldehyde dehydrogenase B (EC 1.2.1.22)
		Microsomal dipeptidase (EC 3.4.13.19)
		High-affinity choline uptake protein BetT
		FIG00989860: hypothetical protein
		hypothetical protein
		Putative translation initiation inhibitor, yjgF family
		Cytosine/purine/uracil/thiamine/allantoin permease family protein
		Electron transfer flavoprotein, alpha subunit
GI64	8636	Protein GlcG
GI65	5084	Acetyl-CoA synthetase (ADP-forming) alpha and beta chains, putative
		Transcriptional regulator, IclR family
		Chromosome initiation inhibitor
		Putative translation initiation inhibitor, yjgF family
		Cysteine desulfurase (EC 2.8.1.7)
GI66	4171	Flagellar motor rotation protein MotB
		Probable transmembrane protein
		Uncharacterized protein ImpJ/VasE
		Uncharacterized protein ImpB
GI67	9467	Uncharacterized protein ImpC
		VgrG protein
		hypothetical protein
		hypothetical protein
		hypothetical protein
		probable membrane protein YPO1482
GI68	4660	Protein ImpG/VasA
		Uncharacterized protein ImpH/VasB
		Type VI secretion lipoprotein/VasD
		PE_PGRS family protein
		Histidine ABC transporter, histidine-binding periplasmic protein precursor HisJ (TC 3.A.1.3.1)
GI69	13525	dicarboxylic acid transporter PcaT
		Short chain fatty acids transporter
		Ornithine cyclodeaminase (EC 4.3.1.12)
		Anaerobic dimethyl sulfoxide reductase chain A (EC 1.8.5.3)
		Transcriptional regulator
		Outer membrane protein (porin)
		hypothetical protein
		Short-chain dehydrogenase/reductase SDR
		Transcriptional regulator, AraC family
		conserved hypothetical protein
GI70	6657	conserved hypothetical protein
		hypothetical protein
		putative nucleoside-diphosphate-sugar epimerase
		epoxide hydrolase
		oxidoreductase of aldo/keto reductase family, subgroup 1
		Epoxide hydrolase
		Transcriptional regulator containing an amidase domain and an AraC-type DNA-binding HTH domain
		hypothetical protein
GI71	23190	Esterase/lipase/thioesterase family protein
		hypothetical protein
		hypothetical protein
		3-oxoacyl-[acyl-carrier protein] reductase (EC 1.1.1.100)
		probable oxidoreductase/Short-chain dehydrogenase
		hypothetical protein
GI72	8884	Chromate transport protein ChrA
		hypothetical protein
		hypothetical protein
		oxidoreductase ylbE
		FIG00459084: hypothetical protein
GI73	6365	hypothetical protein
		hypothetical protein
		oxidoreductase ylbE
		FIG00459084: hypothetical protein
GI74	11659	Bifunctional protein: zinc-containing alcohol dehydrogenase; quinone oxidoreductase ( NADPH:quinone
		hypothetical protein
		hypothetical protein
		Cardiolipin synthetase (EC 2.7.8.-)
		hypothetical protein
		epoxide hydrolase
		Rrf2 family transcriptional regulator, group III
		putative 2-pyrone-4,6-dicarboxylic acid hydrolase
GI75	11807	Proline dehydrogenase (EC 1.5.99.8) (Proline oxidase)
		Transcriptional regulator, LuxR family
		Sensor histidine kinase
		probable extracellular solute-binding protein
		Alpha-ketoglutarate permease
		Aconitate hydratase (EC 4.2.1.3)
		LysR family transcriptional regulator STM3121
		Acriflavin resistance protein
GI76	16529	Acriflavin resistance protein
		Probable Co/Zn/Cd efflux system membrane fusion protein
		RND efflux system, outer membrane lipoprotein, NodT family
		Response regulators consisting of a CheY-like receiver domain and a winged-helix DNA-binding domain
		two-component sensor
		Outer membrane protein (porin)
		surface antigen gene
		FOG: TPR repeat
		hypothetical protein
		hypothetical protein
		FOG: TPR repeat
		Chromosome initiation inhibitor
GI77	11796	FIG00459084: hypothetical protein
		Nucleoside ABC transporter, permease protein 1
		ABC sugar transporter, inner membrane subunit
GI78	6172	INTEGRAL MEMBRANE PROTEIN (Rhomboid family)
		FIG00453569: hypothetical protein
		hypothetical protein
		diguanylate phosphodiesterase
		GTP-binding protein EngA
		PE_PGRS family protein
		Methyl-accepting chemotaxis protein
GI79	5008	Flagellar transcriptional activator FlhC
		Flagellar transcriptional activator FlhD
		COG2391: Predicted transporter component
		Histone acetyltransferase HPA2 and related acetyltransferases
		Predicted transcriptional regulators
		FIG045511: hypothetical antitoxin (to FIG022160: hypothetical toxin)
		Phage-related protein
GI80	4440	FIG003003: hypothetical protein
		Predicted transcriptional regulator LiuQ of leucine degradation pathway, TetR family
		hypothetical protein
		Isovaleryl-CoA dehydrogenase (EC 1.3.8.4); Acyl-CoA dehydrogenase, short-chain specific (EC 1.3.8.1)
GI81	4014	FIG006045: Sigma factor, ECF subfamily
		FIG00977558: hypothetical protein
		putative oxidoreductase
		Xaa-Pro aminopeptidase (EC 3.4.11.9)
		putative integral membrane protein
GI82	6085	diguanylate cyclase/phosphodiesterase (GGDEF & EAL domains) with PAS/PAC sensor(s)
		hypothetical protein
		3-ketoacyl-CoA thiolase (EC 2.3.1.16) @ Acetyl-CoA acetyltransferase (EC 2.3.1.9)
		hypothetical protein
