# Supplementary material for: Comprehensive genome analysis of a pangolin-associated Paraburkholderia fungorum provides new insights into its secretion systems and virulence
Source: PeerJ. 2020 Sep 3;8:e9733. doi: 10.7717/peerj.9733 (PMC7474880; doi:10.7717/peerj.9733)
Supplement: Supplemental Information 6 [file peerj-08-9733-s006.xlsx]

## Sheet: Supplemental Table S3
Supplemental Table 3: Three incomplete putative prophages identified using PHAST.
Region	Region Length	Completeness	Score	#CDS	Region Position	GC%	CDS#	CDS Position	Blast Hit	E-value
1	7.8Kb	Incomplete	40	10	1858893-1866764	0.6367	1	1858893 -1859633	PHAGE_Bacill_Bcp1_NC_024137: RNA polymerase sigma-70 factor, sigma-B/F/G subfamily; PP_01567; phage(gi640884077)	3e-08
							2	Complement (1859698 -1860108)	PHAGE_Haemop_HP2_NC_003315: hypothetical protein; PP_01569; phage(gi17981828)	2e-16
							3	Complement (1860105 - 1860287)	PHAGE_Haemop_HP2_NC_003315: hypothetical protein; PP_01568; phage(gi19289355)	2e-11
							4	Complement (1860597 - 1861043)	flagella synthesis protein [Burkholderia xenovorans LB400]. gi|91785640|ref|YP_560846.1|; PP_01570	6e-69
							5	Complement (1861138 - 1861494)	anti-sigma-28 factor, FlgM [Burkholderia xenovorans LB400]. gi|91785639|ref|YP_560845.1|; PP_01571	2e-50
							6	Complement (1861678 - 1863138)	PHAGE_Nocard_NBR1_NC_016569: putative tail protein; PP_01572; phage(gi372217616)	3e-05
							7	1863356 - 1863850	flagellar basal body rod protein FlgB [Burkholderia xenovorans LB400]. gi|91785637|ref|YP_560843.1|; PP_01573	2e-81
							8	1864021 - 1864446	flagellar basal body rod protein FlgC [Burkholderia xenovorans LB400]. gi|91785636|ref|YP_560842.1|; PP_01574	2e-72
							9	1864457 - 1865203	PHAGE_Escher_121Q_NC_025447: long tail fiber proximal subunit; PP_01575; phage(gi712914769)	4e-05
							10	1865247 - 1866764	PHAGE_Synech_S_CBS4_NC_016766: tail fiber protein; PP_01576; phage(gi374531790)	3e-11
2	8.2Kb	Incomplete	20	10	2569457-2577705	0.6333	1	2569457 - 2570230	PHAGE_Plankt_PaV_LD_NC_016564: ABC transporter; PP_02243; phage(gi371496158)	4e-22
							2	2570242 - 2570946	PHAGE_Plankt_PaV_LD_NC_016564: ABC transporter; PP_02244; phage(gi371496158)	8e-18
							3	Complement (2571051 - 2571518)	PHAGE_Salmon_SPN3US_NC_027402: putative GNAT family acetyltransferase; PP_02245; phage(gi849122629)	3e-07
							4	Complement (2571537 - 2572721)	PHAGE_Rhodoc_E3_NC_021347: putative aminotransferase; PP_02246; phage(gi509142328)	5e-16
							5	Complement (2573097 - 2574128)	PHAGE_Synech_ACG_2014f_NC_026927: hypothetical protein; PP_02247; phage(gi100237)	8e-12
							6	Complement (2574212 - 2574340)	hypothetical; PP_02248	0
							7	2574291 - 2575259	hypothetical protein Bxe_A0830 [Burkholderia xenovorans LB400]. gi|91784950|ref|YP_560156.1|; PP_02249	2e-145
							8	Complement (2575285 - 2575473)	hypothetical protein Bxe_A0831 [Burkholderia xenovorans LB400]. gi|91784949|ref|YP_560155.1|; PP_02250	2e-20
							9	Complement (2575641 - 2576351)	pseudouridine synthase [Burkholderia sp. CCGE1001]. gi|323527102|ref|YP_004229255.1|; PP_02251	2e-118
							10	2576446 - 2577705	PHAGE_Lactob_jlb1_NC_024206: putative minor tail protein; PP_02252; phage(gi971848929)	6e-05
3	8.8Kb	Incomplete	20	6	3706583-3715420	0.5802	1	3706583 - 3708505	PHAGE_Thermu_phiYS40_NC_008584: serine kinase; PP_03150; phage(gi118197679)	2e-49
							2	3708660 - 3709931	PHAGE_Thermu_phiYS40_NC_008584: conserved bacterial protein; PP_03151; phage(gi118197676)	3e-15
							3	3709928 - 3711643	PHAGE_Thermu_phiYS40_NC_008584: SpoVR; PP_03152; phage(gi118197677)	3e-08
							4	3712520 - 3712822	PHAGE_Shigel_Sf6_NC_005344: gene 56 protein; PP_03153; phage(gi41057344)	7e-12
							5	3712876 - 3713694	PHAGE_Shigel_Sf6_NC_005344: putative transposase OrfB; PP_03154; phage(gi41057343)	1e-62
							6	3714107 - 3715420	PHAGE_Burkho_phi1026b_NC_005284: gp59; PP_03155; phage(gi38707949)	1e-48
